# Supplementary material for: Improved H2 utilization by Pd doping in cobalt catalysts for reductive amination of polypropylene glycol
Source: Royal Society of Chemistry journal article supplement (doi:10.1039/d0ra10033a), 2020-01-01
Supplement: d0ra10033a1.pdf [file d0ra10033a1.pdf]

## Electronic Supplementary Information

### Improved H<sub>2</sub> Utilization by Pd doping in Cobalt Catalysts for Reductive Amination of Polypropylene Glycol

Kyungjun Kim<sup>1,2</sup>, Dong Woo Kang<sup>1</sup>, Youngheon Choi<sup>2</sup>, Wanggyu Kim<sup>2</sup>, Hyunjoo Lee<sup>1</sup>, Jae W. Lee<sup>1\*</sup>

<sup>1</sup>Department of Chemical and Biomolecular Engineering, Korea Advanced Institute of Science  
and Technology (KAIST), Daejeon 34141, Republic of Korea

<sup>2</sup>LOTTE CHEMICAL R&D Center, Daejeon 34110, Republic of Korea

Tel: +82-42-350-3940

FAX: +82-42-350-3910

E-mail: jaewlee@kaist.ac.kr.

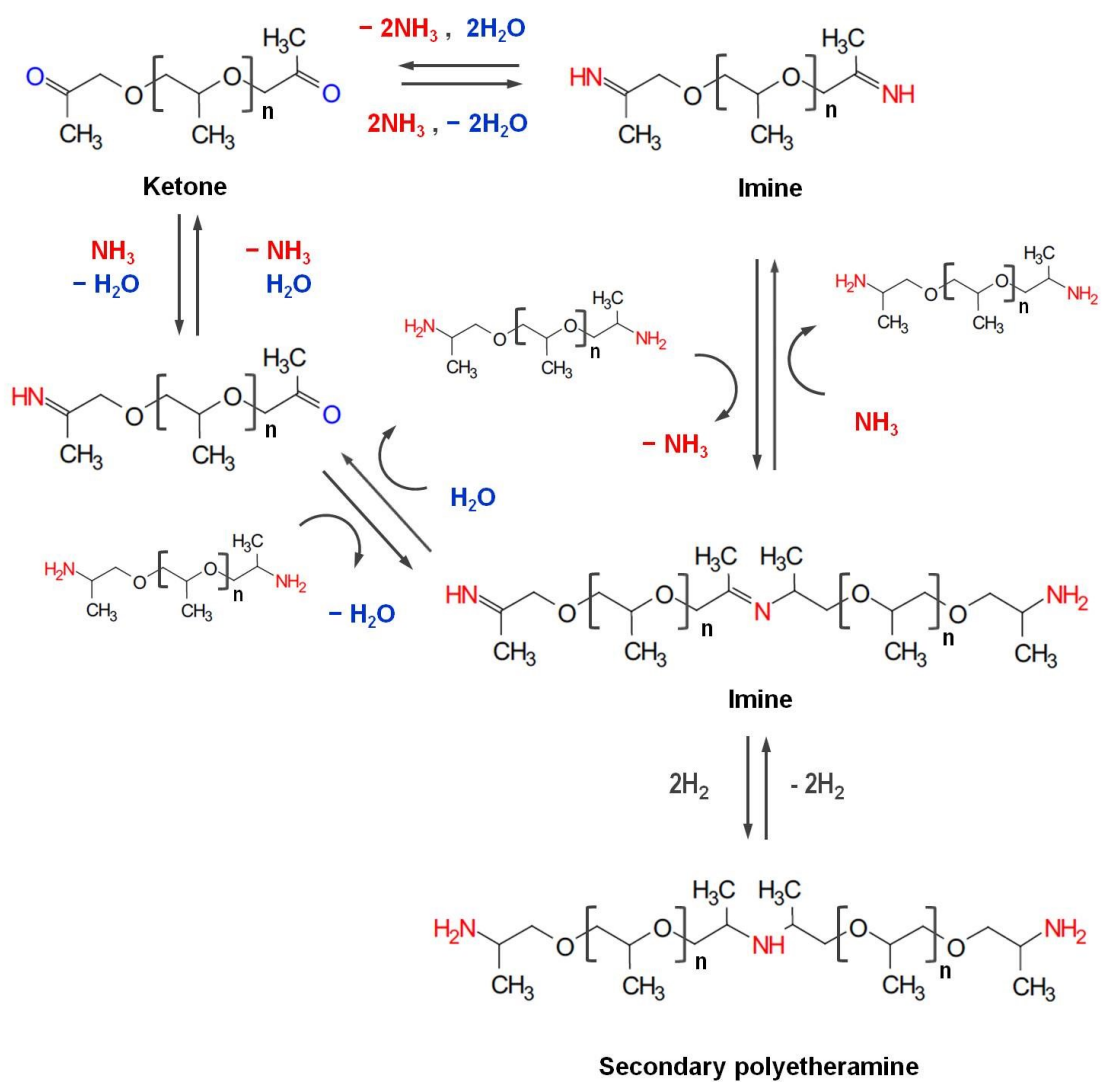

Scheme S1. Reaction mechanism for the formation of secondary polyetheramine.

Table S1. Catalyst properties of Co-based catalysts including different Pd amounts.

| Catalysts                                     | Contents of Co/Y/Pd <sup>a)</sup> (wt%) |       |       | $S_{\text{BET}}^{\text{b)}$<br>(m <sup>2</sup> /g) | $D_{\text{Co}}^{\text{c)}$<br>(nm) |
|-----------------------------------------------|-----------------------------------------|-------|-------|----------------------------------------------------|------------------------------------|
|                                               | Co                                      | Y     | Pd    |                                                    |                                    |
| Co-Y <sub>2</sub> O <sub>3</sub> -Pd(0)/MS    | 34.89                                   | 0.527 | -     | 2.15x10 <sup>2</sup>                               | 8.2                                |
| Co-Y <sub>2</sub> O <sub>3</sub> -Pd(0.02)/MS | 35.66                                   | 0.542 | 0.018 | 2.36x10 <sup>2</sup>                               | 15.9                               |
| Co-Y <sub>2</sub> O <sub>3</sub> -Pd(0.03)/MS | 35.04                                   | 0.532 | 0.028 | 2.59x10 <sup>2</sup>                               | 16.8                               |
| Co-Y <sub>2</sub> O <sub>3</sub> -Pd(0.06)/MS | 35.42                                   | 0.537 | 0.059 | 2.49x10 <sup>2</sup>                               | 13.9                               |
| Co-Y <sub>2</sub> O <sub>3</sub> -Pd(0.1)/MS  | 35.32                                   | 0.535 | 0.105 | 2.32x10 <sup>2</sup>                               | 14.0                               |
| Co-Y <sub>2</sub> O <sub>3</sub> -Pd(0)       | 70.17                                   | 1.155 | -     | 2.95x10                                            | 19.9                               |
| Co-Y <sub>2</sub> O <sub>3</sub> -Pd(0.02)    | 68.18                                   | 1.113 | 0.017 | 2.91x10                                            | 19.0                               |
| Co-Y <sub>2</sub> O <sub>3</sub> -Pd(0.04)    | 69.30                                   | 1.134 | 0.038 | 3.10x10                                            | 17.9                               |
| Co-Y <sub>2</sub> O <sub>3</sub> -Pd(0.05)    | 69.48                                   | 1.140 | 0.054 | 2.74x10                                            | 18.6                               |

<sup>a)</sup> Determined by ICP-OES analysis for the fresh catalysts. <sup>b)</sup> BET surface area for fresh catalysts. <sup>c)</sup> The Co crystal size of the fresh catalysts was estimated by XRD patterns.

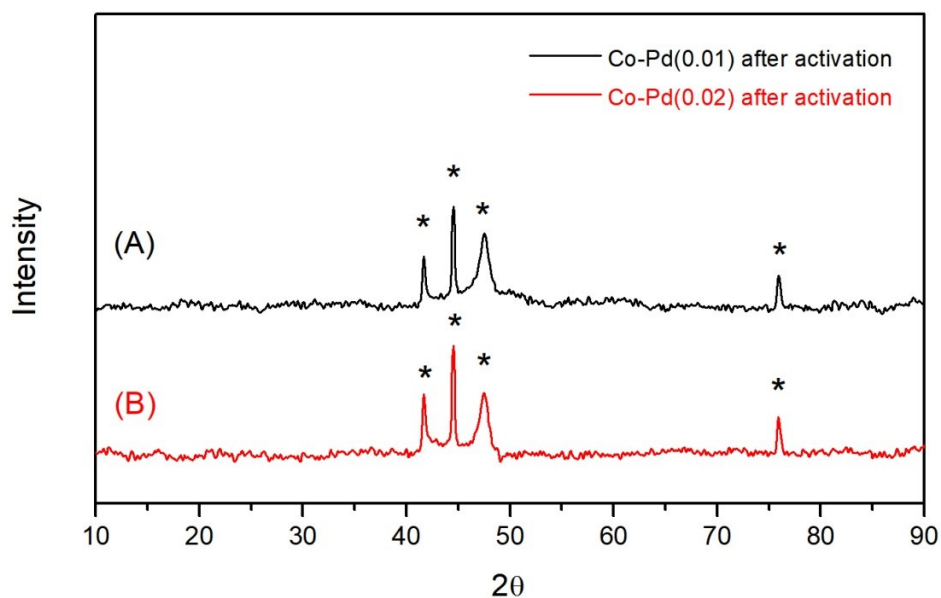

Fig. S1. XRD for pre-activated Co-Pd(0.01) at  $P(\text{H}_2)=50$  bar (A) and XRD for pre-activated Co-Pd(0.02) at  $P(\text{H}_2)=50$  bar (B). (\*):  $\text{Co}^0$ .

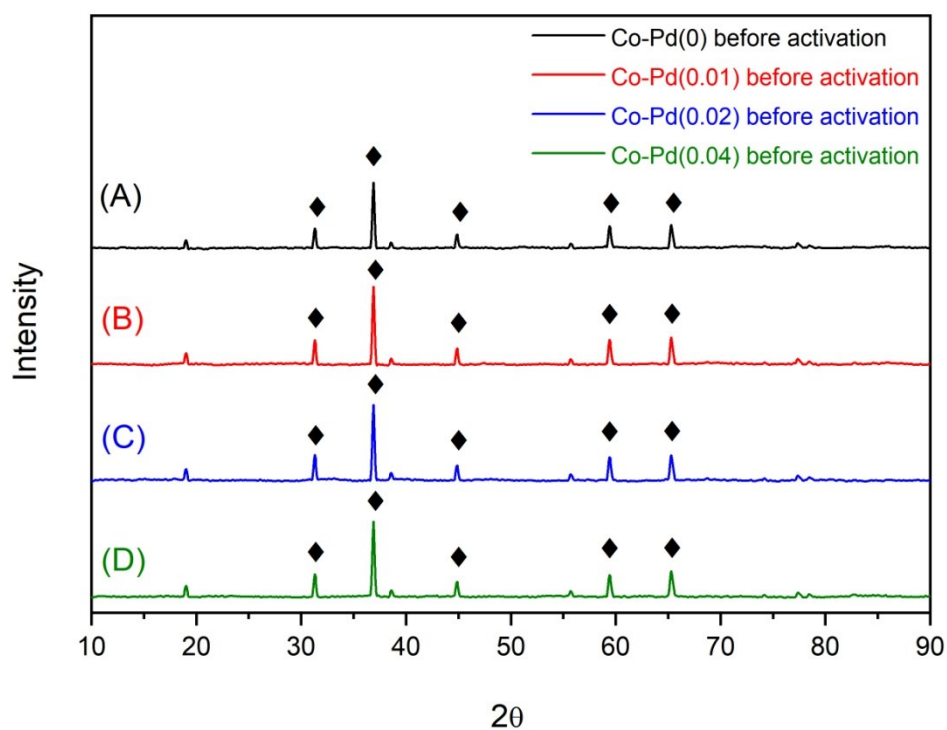

Fig. S2. XRD for Co-Pd(0) before catalyst activation (A), XRD for Co-Pd(0.01) before catalyst activation (B), XRD for Co-Pd(0.02) before catalyst activation (C), and XRD for Co-Pd(0.04) before catalyst activation (D). (◆):  $\text{Co}_3\text{O}_4$ .

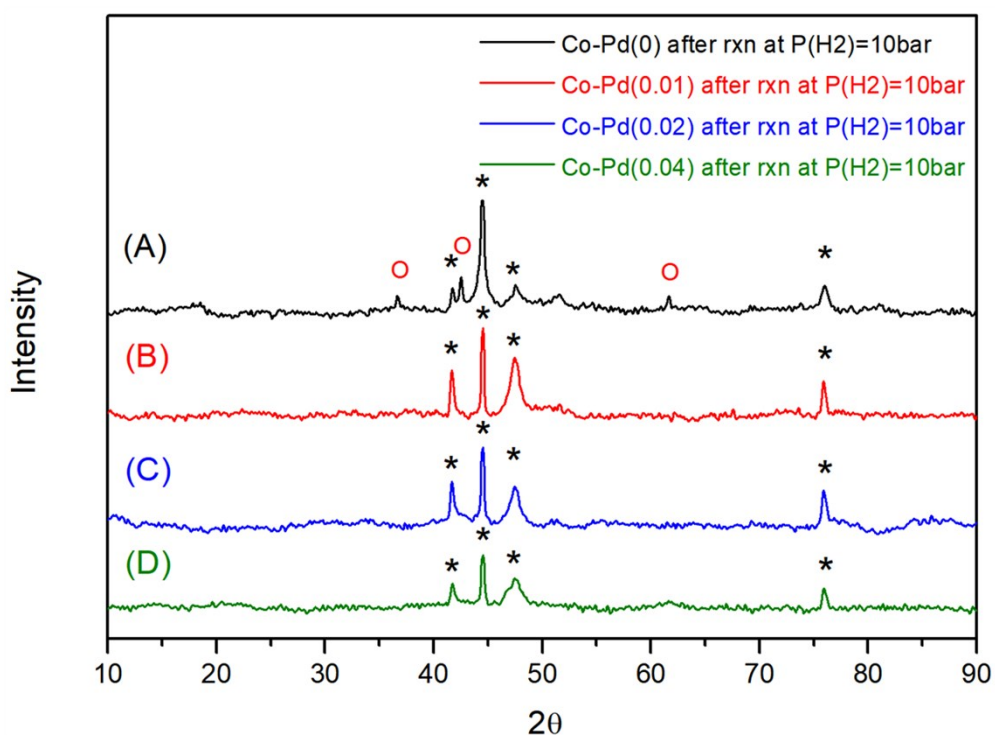

Fig. S3. XRD for spent Co-Pd(0) at  $P(H_2)=10$  bar (A), XRD for spent Co-Pd(0.01) at  $P(H_2)=10$  bar (B), XRD for spent Co-Pd(0.02) at  $P(H_2)=10$  bar (C) and XRD for spent Co-Pd(0.04) at  $P(H_2)=10$  bar (D). (\*):  $Co^0$ , (O):  $CoO$ , (◆):  $Co_3O_4$ .

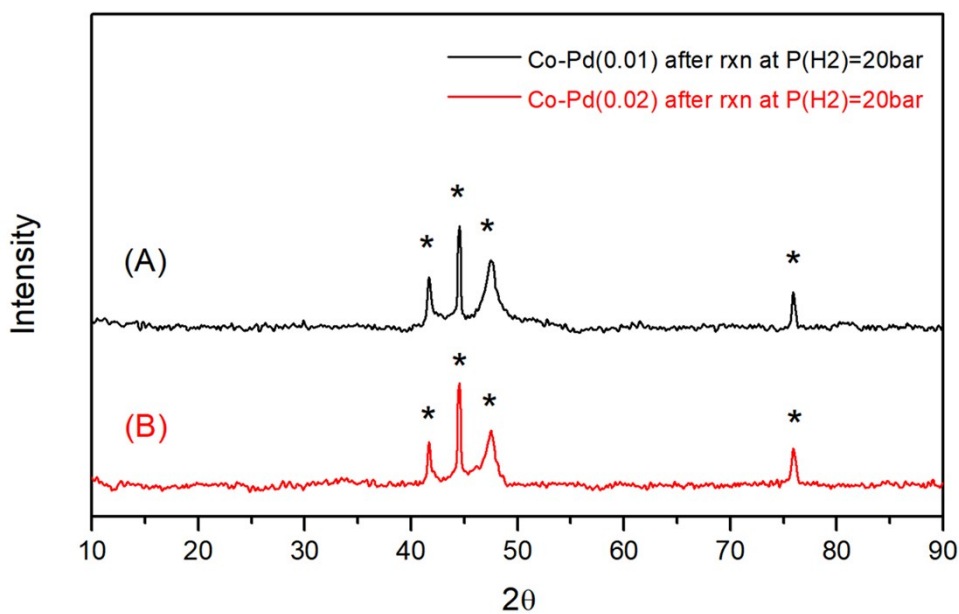

Fig. S4. XRD for spent Co-Pd(0.01) at  $P(H_2)=20$  bar (A) and XRD for spent Co-Pd(0.02) at  $P(H_2)=20$  bar (B). (\*):  $Co^0$ , (O):  $CoO$ , (◆):  $Co_3O_4$ .

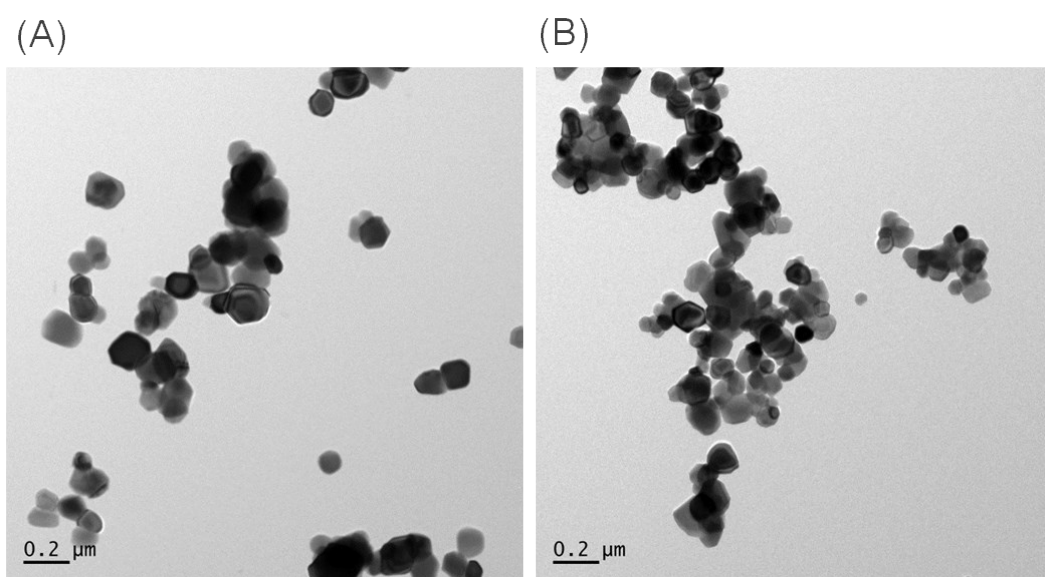

Fig. S5. TEM images for Co-Pd(0) before catalyst activation (A), for Co-Pd(0.04) before catalyst activation (B).

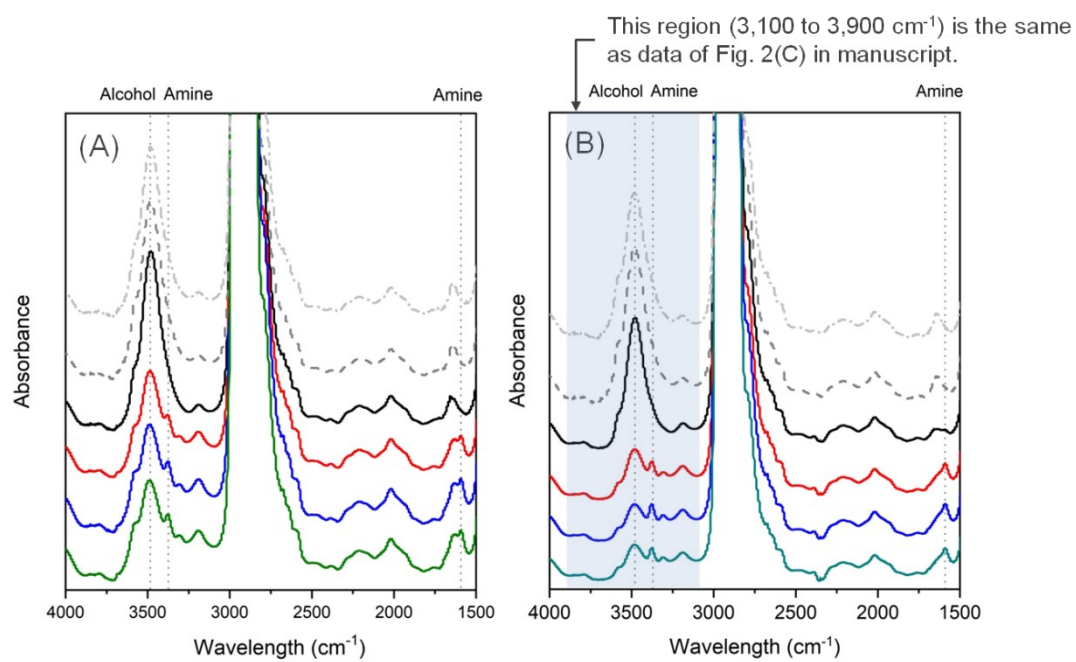

Fig. S6. IR results for PEA product at  $P(H_2)=10$  bar by Co-Pd catalysts (A), at  $P(H_2)=20$  bar by Co-Pd catalysts.

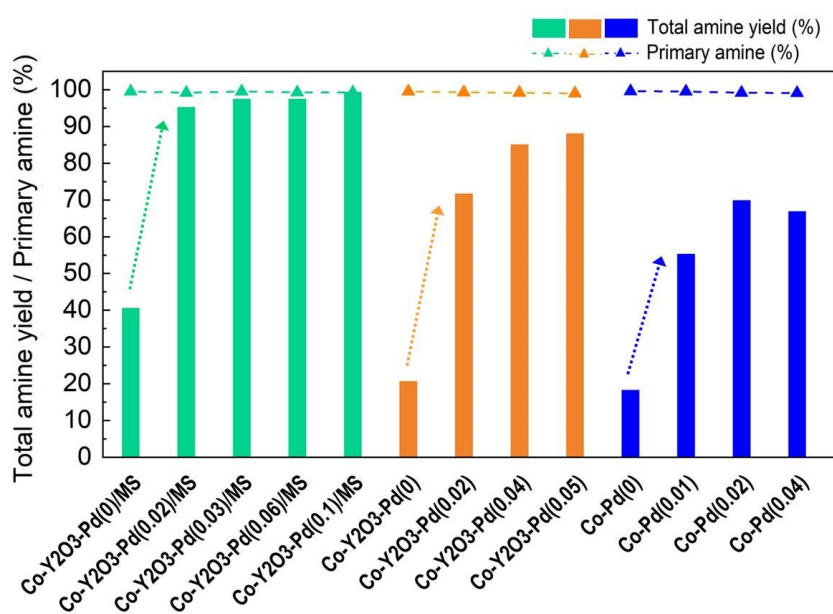

Fig. S7. Catalytic performance of Co based catalysts such as Co-Y<sub>2</sub>O<sub>3</sub>-Pd/MS, Co-Y<sub>2</sub>O<sub>3</sub>-Pd and Co-Pd with varying Pd amounts under P(H<sub>2</sub>)=40 bar. Reaction conditions are NH<sub>3</sub>/PPG-2000=40, PPG-2000: 70g, reaction temperature: 220°C, P(H<sub>2</sub>)=40 bar and catalyst weight: 3.5 g for Co-Y<sub>2</sub>O<sub>3</sub>-Pd/MS, 2.0 g for Co-Y<sub>2</sub>O<sub>3</sub>-Pd and Co-Pd.



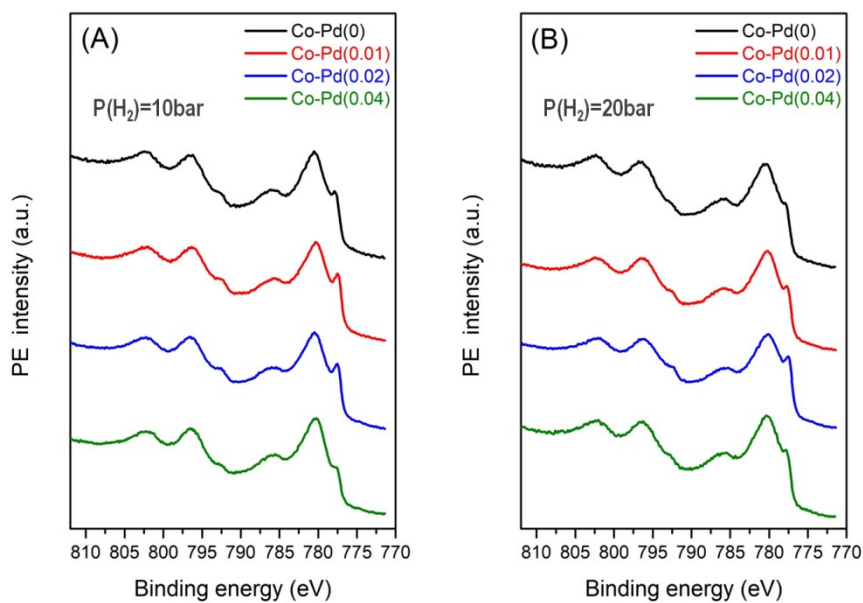

Fig. S8. Co 2p XPS for catalysts after reaction at  $P(\text{H}_2)=10\text{ bar}$  (A), at  $P(\text{H}_2)=20\text{ bar}$  (B). Co 2p peaks in each sample were normalized to compare quantitatively as a way of dividing Co 2p peak intensity with relative ratio of Co 2p area (771 eV to 812 eV) in each sample.

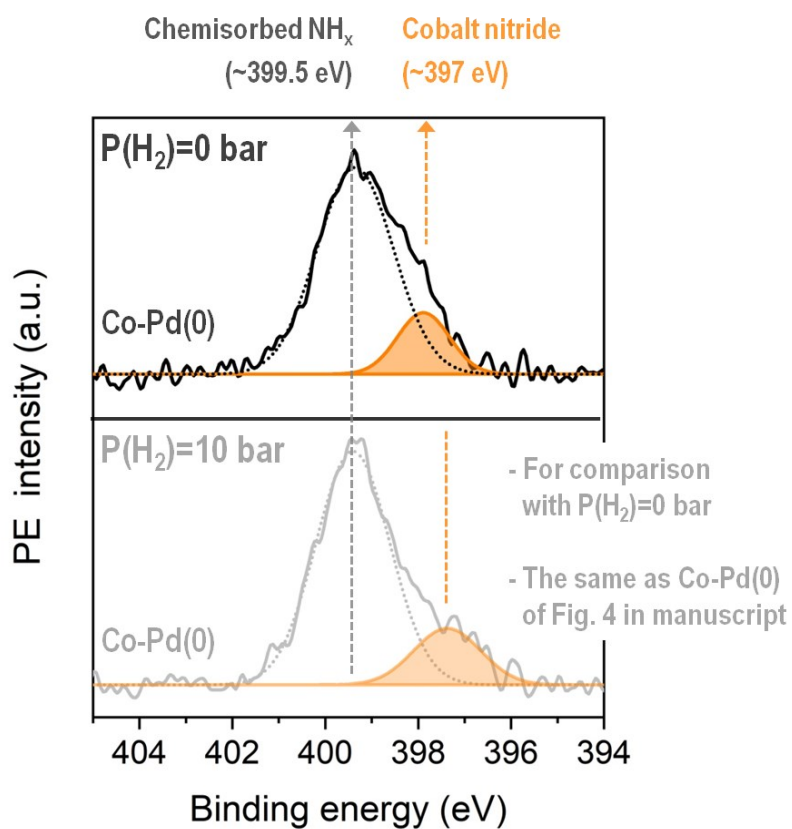

Fig. S9. N 1s XPS for spent Co-Pd(0) after reaction at P( $\text{H}_2$ )=0 bar.

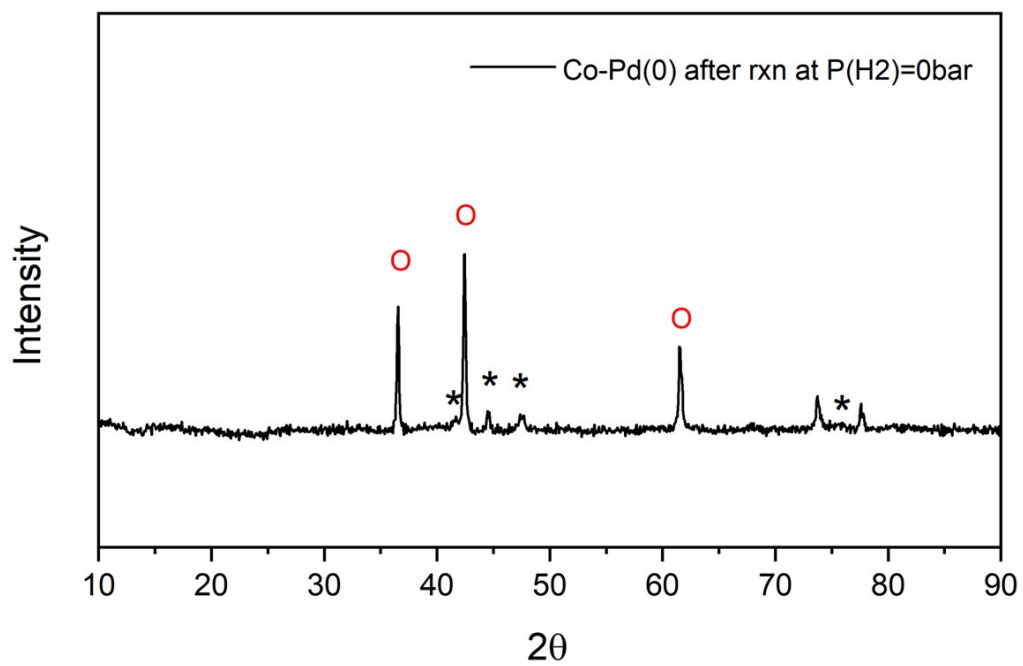

Fig. S10. XRD for spent Co-Pd(0) at P(H<sub>2</sub>)=0 bar. (\*): Co<sup>0</sup>, (○): CoO.

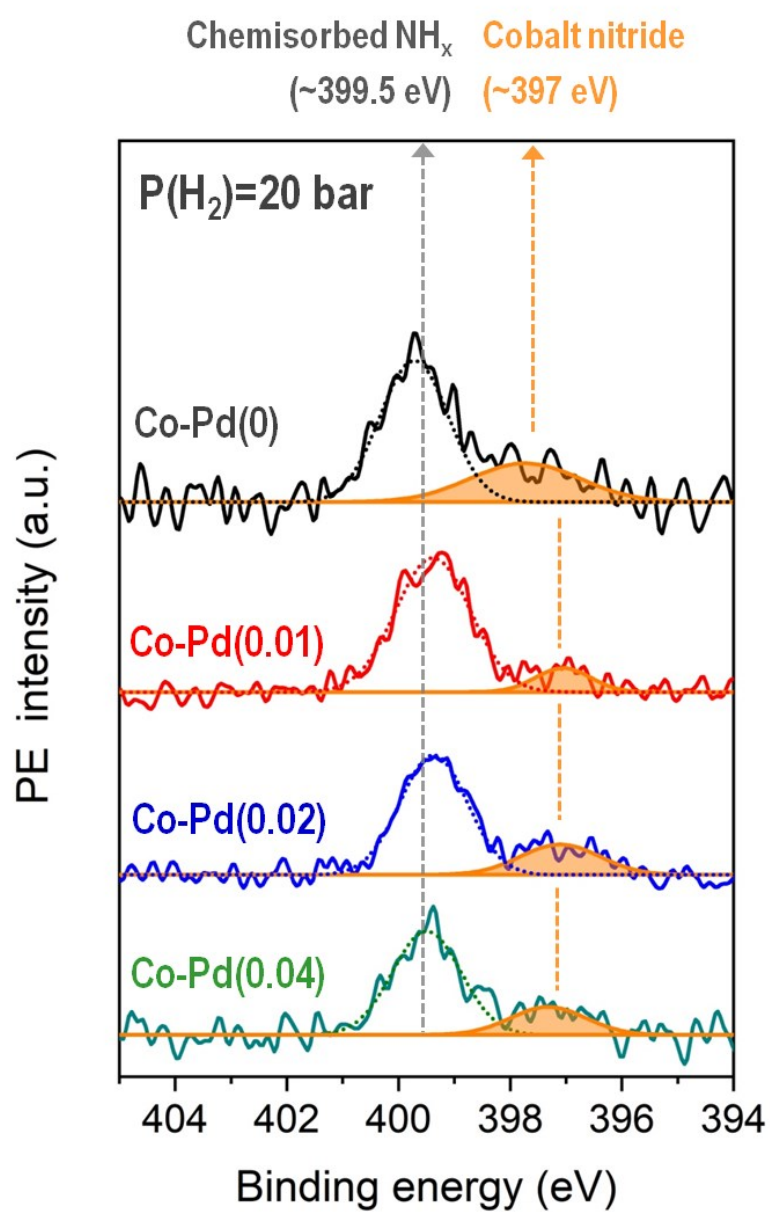

Fig. S11. N 1s XPS for spent catalysts after reaction at  $\text{P}(\text{H}_2)=20$  bar.

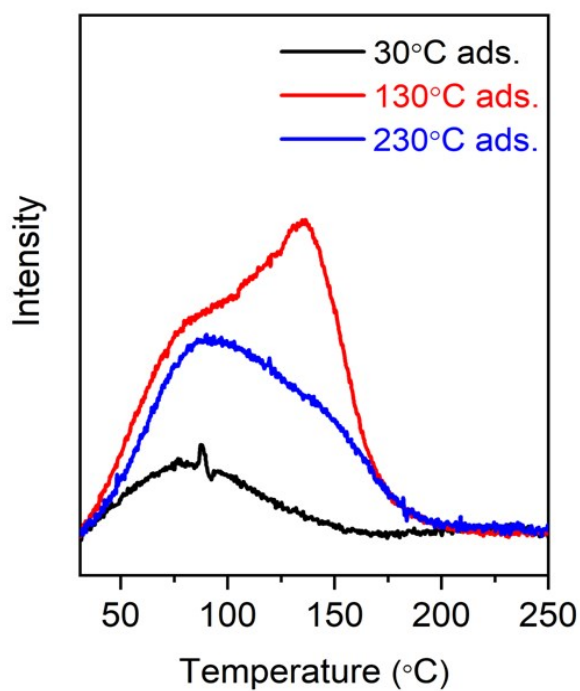

Fig. S12. H<sub>2</sub>-TPD for Co-Pd(0) catalyst depending on H<sub>2</sub> adsorption temperature. Pretreatment conditions: After catalyst reduction in 5.0 % H<sub>2</sub>/Ar by 460 °C, temperature was maintained at 460 °C for 15 min in Ar for removing both free H<sub>2</sub> and adsorbed H<sub>2</sub>. In addition, H<sub>2</sub> was adsorbed at each temperature for 2 h and then the catalysts were cooled to room temperature. Measurement conditions: Ramping rate 10 °C/min, Ar 30 sccm.

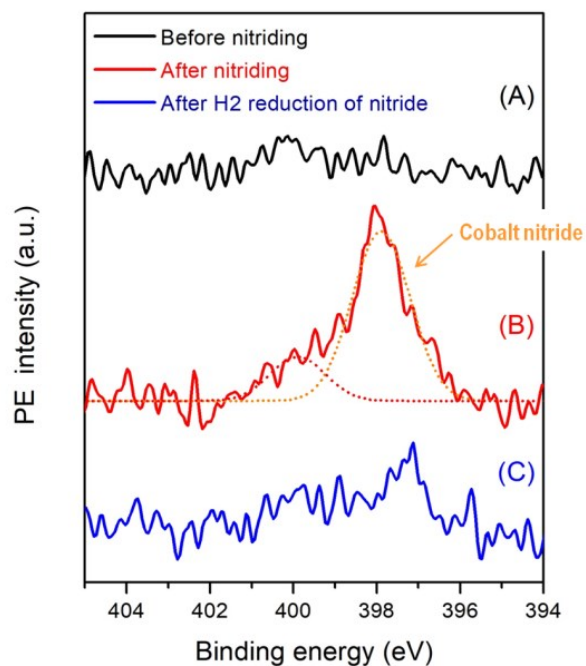

Fig. S13. N 1s XPS for Co-Pd(0) after catalyst activation by 5.0 % H<sub>2</sub>/Ar by 460 °C (Before nitriding) (A), XPS N1s for Co-Pd(0) after introducing 5.0 % NH<sub>3</sub>/He into activated catalyst at 230 °C for 0.5 h (After nitriding) (B), and XPS N1s for Co-Pd(0) after introducing H<sub>2</sub> into Co<sub>3</sub>N containing catalyst until temperature reaches to 220 °C (After H<sub>2</sub> reduction of nitride) (C).

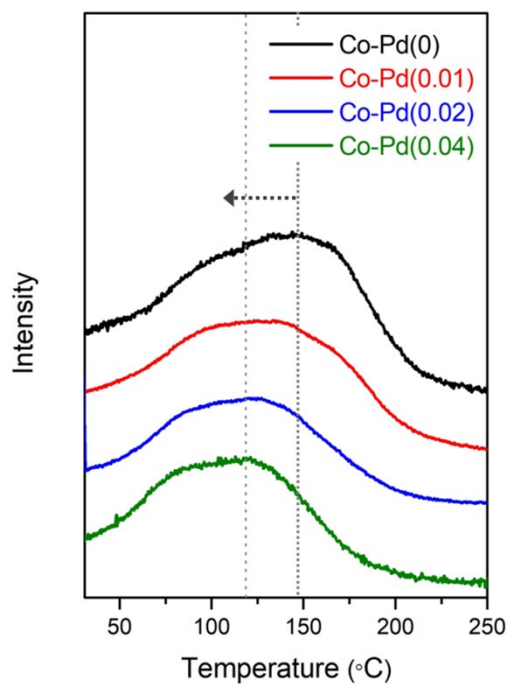

Fig. S14. H<sub>2</sub>-TPD for Co-Pd catalysts with the step for the formation of cobalt nitride. Pretreatment conditions: After catalyst reduction in 5.0 % H<sub>2</sub>/Ar by 460 °C, temperature was maintained at 460 °C for 15min in Ar for removing both free H<sub>2</sub> and adsorbed H<sub>2</sub>. And 5.0 % NH<sub>3</sub>/He was introduced at 230 °C for 0.5 h to form cobalt nitride. Catalysts were cooled to the room temperature. H<sub>2</sub> was introduced to reduce cobalt nitride until temperature reached to 220 °C, followed by maintaining at 220 °C to remove both free H<sub>2</sub> and adsorbed H<sub>2</sub>. Then H<sub>2</sub> was adsorbed at 130 °C for 2 h and catalysts were cooled to the room temperature. Measurement conditions: Ramping rate 10 °C/min, Ar 30 sccm.

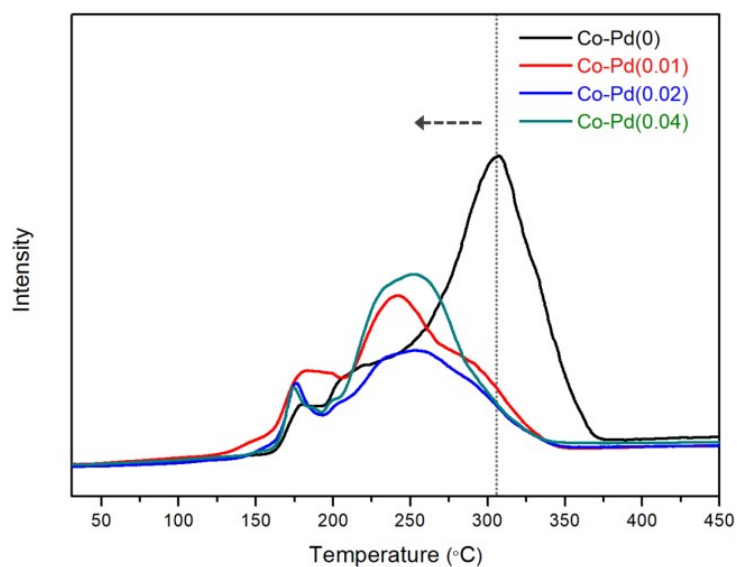

Fig. S15.  $H_2$  temperature programmed adsorption of the Co-Pd catalysts containing cobalt nitride. Pretreatment conditions: After catalyst reduction in 5.0 %  $H_2$ /Ar by 460 °C and temperature was maintained at 460 °C for 15 min in Ar for removing both free  $H_2$  and adsorbed  $H_2$ . 5.0 %  $NH_3$ /He was introduced at 230 °C for 0.5 h to form cobalt nitride. Catalysts were cooled to the room temperature. Measurement conditions: Ramping rate 10 °C/min, 5.0 %  $H_2$ /Ar 30 sccm.
